# Supplementary material for: Hepatitis C Core Protein Induces a Genotype-Specific Susceptibility of Hepatocytes to TNF-Induced Death In Vitro and In Vivo
Source: MDPI journal article supplement (doi:10.3390/v14112521), 2022-11-14
Supplement: s1 [file s1]

## Supplementary Figures

CLUSTAL O(1.2.4) multiple sequence alignment

```

core_4a      MSTNPKPQRKTKRNTNRRPMDVKFPGGGQIVGGVYLLPRRGPRLGVRATRKTSEERSQPRG      60
core_4f      MSTNPKPQRKTKRNTNRRPMDVKFPGGGQIVGGVYLLPRRGPRLGVRATRKTSEERSQPRG      60
*****

core_4a      RRQPIPKARRSEGRSWAQPGYPWPLYGNEGCGWAGWLLSPRGSRPSWGPNDPRRRSRNLG      120
core_4f      RRQPIPKARRTEGRSWAQPGYPWPLYGNEGCGWAGWLLSPRGSRPSWGPNDPRRRSRNLG      120
*****:*****

core_4a      KVIDTLTCGFADLMGYIPLVGAPVGGVARALAHGVRAVEDGINYATGNLPGCSFSIFLLA      180
core_4f      KVIDTLTCGFADLMGYIPLVGAPVGGVARALAHGVRAVEDGINYATGNLPGCSFSIFLLA      180
*****

core_4a      LLSCLTVPASTT      191
core_4f      LLSCLTVPASAA      191
*****:

```

**Figure S1.** Clustal Omega alignment of HCV core proteins from the two subtype 4a and 4f strains used in the present study. Bold letters note the amino acid differences between the two strains.

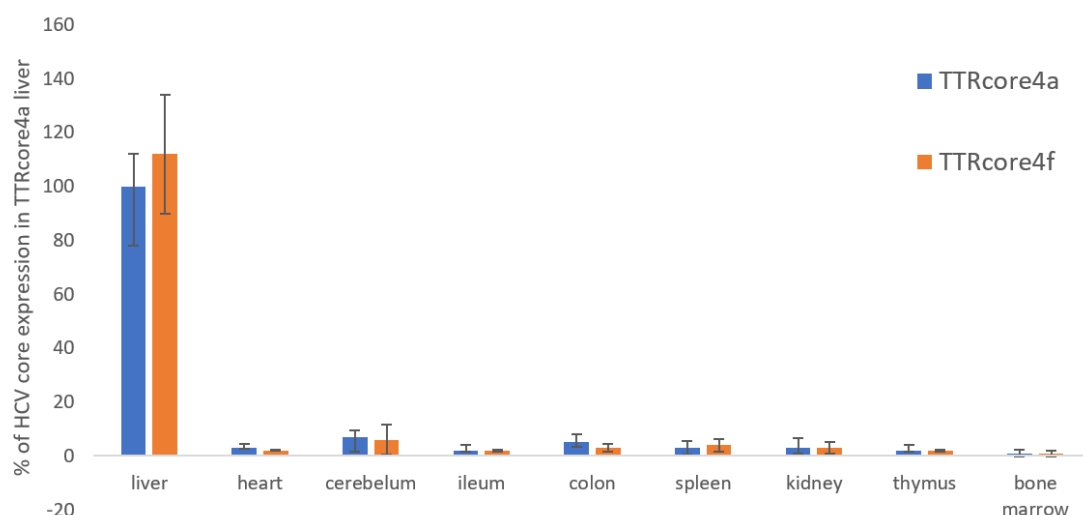

**Figure S2.** HCV core mRNA expression in various tissues for the assessment of tissue specificity of the expression. Real time RT-PCR and  $\Delta\Delta C_t$  using GAPDH as normalizer was used to estimate relative expression of HCV mRNA in tissues of the TTRcore4a and TTRcore4f transgenic mice.

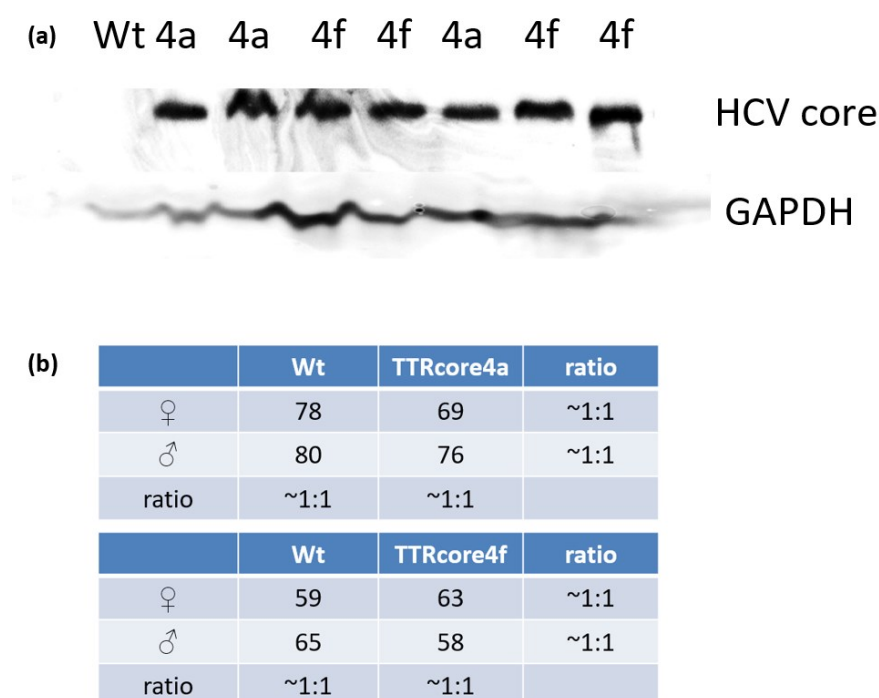

**Figure S3.** (a) Western blot of total protein from liver biopsies of TTRcore4a and TTRcore4f mice and a wt control from the first litters of both lines. (b) Mendelian ratios of offspring from 50 litters for both TTRcore4a and TTRcore4f lines.

### Supplementary Table

**Table S1.** Oligonucleotide primers for real time RT-PCR used for the verification of the differentially expressed genes in transgenic mice.

| Gene Symbol          | Forward Primer          | Reverse Primer          |
|----------------------|-------------------------|-------------------------|
| <i>ADAMDEC1</i>      | CCTGGGACTTCTCGGCTAC     | TTCGTGAGGCTTTAACTCGGG   |
| <i>SAA1</i>          | AAGCTAACTGGAAAACTCA     | TCAGCCATGGTGTCTCTCGTGT  |
| <i>SAA1</i>          | AAGCTGGCTGGAAAGATGGA    | TCAGCCATGGTGTCTCTCGTGT  |
| <i>MT1</i>           | AAGAGTGAGTTGGGACACCTT   | CGAGACAATACAATGGCCTCC   |
| <i>MT2</i>           | GCCTGCAAATGCAAACAATGC   | AGCTGCACTTGTCGGAAGC     |
| <i>GSN</i>           | TCACGGGTGATGCCTATGTCA   | AGCCAATAGTGGAGGTCATACTG |
| <i>HAMP</i>          | CTGAGCAGCACCACCTATCTC   | TGGCTCTAGGCTATGTTTTGC   |
| <i>HAMP2</i>         | CTGAGCAGCACCACCTATCTC   | GGCTCTAGGCTCTCTATTCTTCA |
| <i>GAPDH</i>         | AGGTCGGTGTGAACGGATTG    | TGTAGACCATGTAGTTGAGGTCA |
| <i>CCL2</i>          | TTAAAAACCTGGATCGGAACCAA | GCATTAGCTTCAGATTTACGGGT |
| <i>CCL3</i>          | TTCTCTGTACCATGACACTCTGC | CGTGGAATCTTCCGGCTGTAG   |
| <i>CCL5</i>          | GCTGCTTTGCCTACCTCTCC    | TCGAGTGACAAACACGACTGC   |
| <i>CCL7</i>          | GCTGCTTTGAGCATCCAAGTG   | CCAGGGACACCGACTACTG     |
| <i>CCL11</i>         | GAATCACCAACAACAGATGCAC  | ATCCTGGACCCACTTCTTCTT   |
| <i>IL2RG</i>         | CTCAGGCAACCAACCTCAC     | GCTGGACAACAAATGTCTGGTAG |
| <i>CFLAR (cFLIP)</i> | GCTCCAGAATGGGCGAAGTAA   | ACGGATGTGCGGAGGTAAAAA   |
